# Supplementary material for: Angiotensin II Increases Endoplasmic Reticulum Stress in Adipose Tissue and Adipocytes
Source: PubMed Central journal article supplement (PMC6560092; doi:10.1038/s41598-019-44834-8), 2019-06-11
Supplement: 41598_2019_44834_MOESM1_ESM.pdf [file 41598_2019_44834_MOESM1_ESM.pdf]

**Angiotensin II Increases Endoplasmic Reticulum Stress in Adipose Tissue and Adipocytes**

**Kalhara R. Menikdiwela, Latha Ramalingam, London Allen, Shane Scoggin, Nishan S.**

**Kalupahana & Naima Moustaid-Moussa**

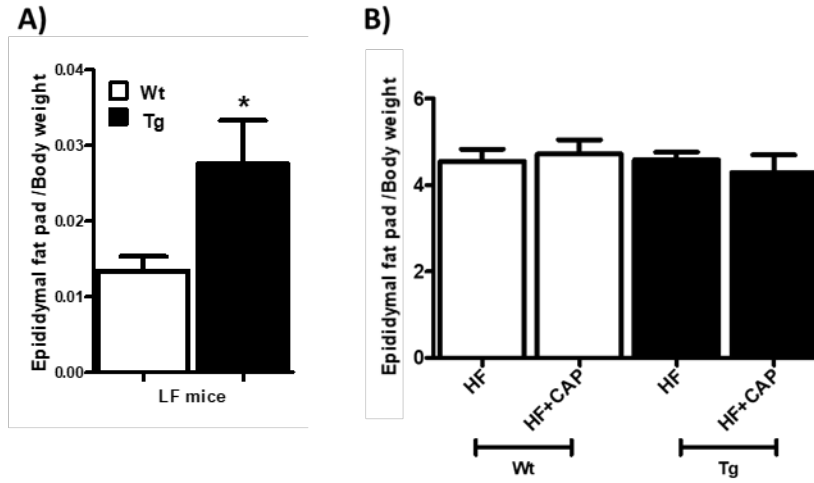

**Supplementary Figure 1. Epididymal fat normalized to body weight of Agt-Tg and Wt mice**

**fed low fat and, high fat with or without captopril:**

Epididymal fat weight normalized to body weight was significantly higher in low fat fed Agt-Tg mice compared to Wt mice (A). However, when Agt-Tg and Wt mice were fed a high fat diet, no changes were observed in normalized epididymal fat weights. Further, no differences were observed with captopril supplementation in Wt mice or Agt-Tg mice (B). Data is presented as mean  $\pm$  SEM. (n=6-8 each group). \* p <0.05.

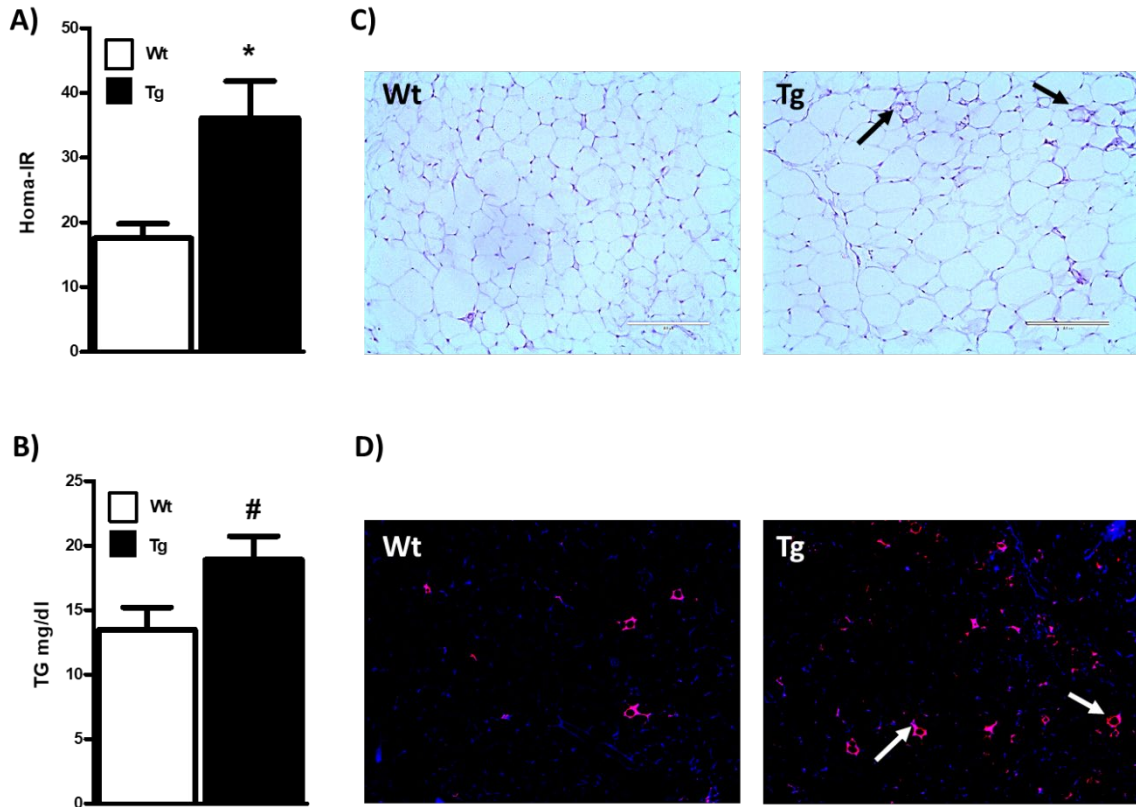

**Supplementary Figure 2. Agt-Tg overexpression in adipose tissue causes obese phenotype:**

Agt-Tg mice showed significantly higher HOMA-IR compared Wt mice (A). Hematoxylin and eosin staining was performed on visceral fat and larger adipocytes were observed in Agt-Tg mice compared to Wt mice (C). Additionally, we observed crown-like structures (indicated in arrows), which represent macrophage infiltration around adipocytes and immunofluorescent staining (Galectin-3 pink color: macrophage marker and Cy3 blue color: nuclei; n=3) confirmed higher macrophage infiltration in Agt-Tg group compared to Wt group (D). Plasma triglyceride levels exhibited increased trends in LF fed Agt-Tg mice compared to Wt mice ( $p=0.0732$ ). Data is presented as mean  $\pm$  SEM. (n=6-8 mice each group). \*  $p < 0.05$ , #  $p < 0.1$ .

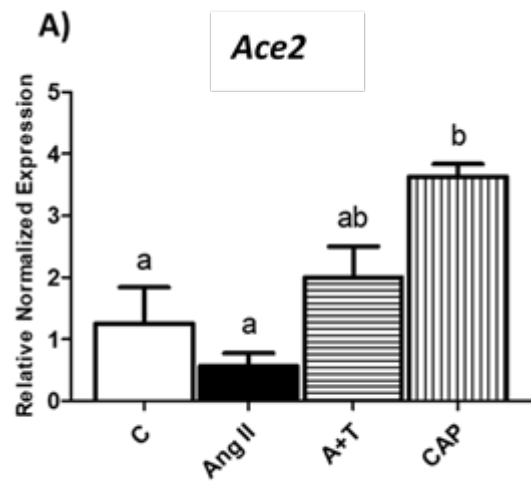

**Supplementary Figure 3. RAS blockage by captopril activates other RAS pathways in**

**HMSCs:** Inhibition of RAS pathway by captopril activates other pathways as HMSCs showed significantly high *Ace2* expression in CAP (captopril) group (A). However, AT1 inhibition did not alter *Ace2* in HMSC. Common letters indicate no significance. Data is presented as mean ± SEM (n=3).  $p < 0.05$ .

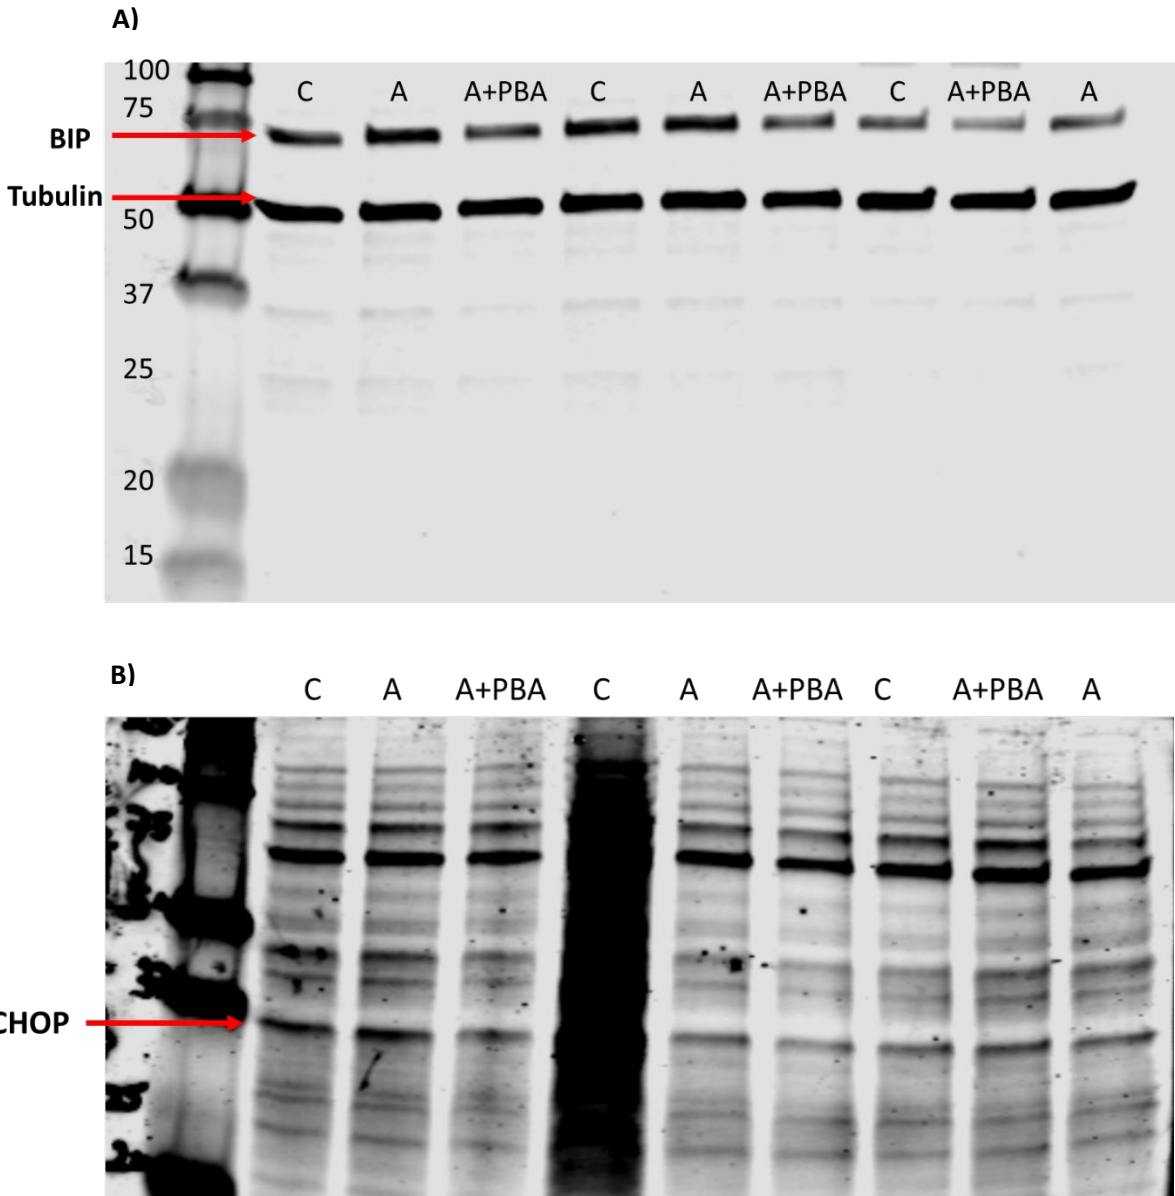

**Supplementary Figure 4. Full-length western blots of ER stress markers BIP and CHOP:**

BIP protein amount was significantly reduced when 3T3-L1 cells treated with PBA (A) and similar reduction was observed in CHOP (B)

| <b>Primer</b>                        | <b>Forward (5'-3') Sequence</b> | <b>Reverse (5'-3') Sequence</b> |
|--------------------------------------|---------------------------------|---------------------------------|
| Mouse <i>Mcp1</i>                    | ACTTCTATGCCTCCTGCTCAT           | GCTGCTTGTGATTCTCCTGTAG          |
| Mouse <i>Atf4</i>                    | AAGCAGCAGAGTCAGGCTTTC           | GGGTTCTGTCTTCCACTCCA            |
| Mouse <i>Bip</i>                     | TTCAGCCAATTATCAGCAAACCTCT       | TTTTCTGATGTATCCTCTTCACCAGT      |
| Mouse <i>Chop</i>                    | CCACCACACCTGAAAGCAGA            | AGGTGAAAGGCAGGGACTCA            |
| Mouse <i>Il6</i>                     | AACCGCTATGAAGTTCCTCTC           | TCCTCTGTGAAGTCTCCTCTC           |
| Mouse <i>NFkB</i>                    | GGTGAAGGTCGGTGTGAAC             | TGAGTGGAGTCATACTGGAACA          |
| Mouse <i>Yy1</i>                     | TACCTGGCATTGACCTCTC             | CTATTGTTCTTGGAGCATCATCTT        |
| Mouse <i>Tflli</i>                   | TGCCTCACTGCCATTCA               | ATCCTCCACCTGCTCAAG              |
| Mouse <i>Gapdh</i>                   | CTGAGTGGAGTCATACTGGAACA         | GGTGAAGGTCGGTGTGAAC             |
| Mouse <i>18S</i>                     | GGACAGGATTGACAGATTGATAGC        | TGCCAGAGTCTCGTTCGTTA            |
| Human <i>Atf4</i>                    | CCTTCACCTTCTTACAACCTCTTC        | GTAGTCTGGCTTCCTATCTCCTT         |
| Human <i>Bip</i>                     | CCGAGGAGGAGGACAAGAAG            | AGGAGTGAAGGCGACATAGG            |
| Human <i>Nfkb<math>\alpha</math></i> | ACCTGGTGTCACTCCTGTT             | GCTCTCCTCATCCTCACTCTC           |
| Human <i>Chop</i>                    | GTCTAAGGCACTGAGCGTATC           | CAGGTGTGGTGATGTATGAAGAT         |
| Human <i>Ace2</i>                    | CTTCCTGGCTCCTTCTCA              | TCTTCGGCTTCGTGGTTA              |
| Human <i>Gapdh</i>                   | AGTCCACTGGCGTCTTCA              | ATCTTGAGGCTGTTGTCATACTTC        |
| Human <i>18S</i>                     | AGTCGCTCCAGGTCTTCA              | GCAGAATCCACGCCAGTA              |

**Supplementary Table 1: List of Primer**
